# Supplementary material for: Gene therapy for epilepsy targeting neuropeptide Y and its Y2 receptor to dentate gyrus granule cells
Source: PubMed Central journal article supplement (PMC11467199; doi:10.1038/s44319-024-00244-0), 2024-09-09
Supplement: 44319_2024_244_MOESM9_ESM.pdf [file 44319_2024_244_MOESM9_ESM.pdf]

## Expanded View Figures

**Figure EV1. Electrophysiological characterization of LV transduced primary rat hippocampal neurons.**

(A–C) Voltage response of LV transduced neurons to suprathreshold depolarizing current steps. (D–H) Dot plots summarizing average resting membrane potential, action potential threshold, input resistance, spontaneous excitatory post-synaptic currents (sEPSCs) amplitude, and sEPSCs frequency of transduced neurons. Data were shown as mean  $\pm$  SEM of 3 independent experiments (biological replicates). (D) LV\_EGFP =  $-55.46 \pm 1.77$  mV; LV\_NPY =  $-57.08 \pm 2.07$  mV; LV\_Y2-NPY =  $-56.43 \pm 2.07$  mV. (E) LV\_EGFP =  $-32.64 \pm 0.45$  mV; LV\_NPY =  $-33.00 \pm 0.66$  mV; LV\_Y2-NPY =  $-32.21 \pm 1.4$  mV. (F) LV\_EGFP =  $261.4 \pm 20.94$  M $\Omega$ ; LV\_NPY =  $223.8 \pm 44.47$  M $\Omega$ ; LV\_Y2-NPY =  $271.5 \pm 42.14$  M $\Omega$ . (G) LV\_EGFP =  $30.93 \pm 4.12$  pA; LV\_NPY =  $28.17 \pm 3.25$  pA; LV\_Y2-NPY =  $34.17 \pm 8.49$  pA. H, LV\_EGFP =  $2.12 \pm 0.38$  Hz; LV\_NPY =  $1.69 \pm 0.32$  Hz; LV\_Y2-NPY =  $2.63 \pm 0.66$  Hz. Source data are available online for this figure.

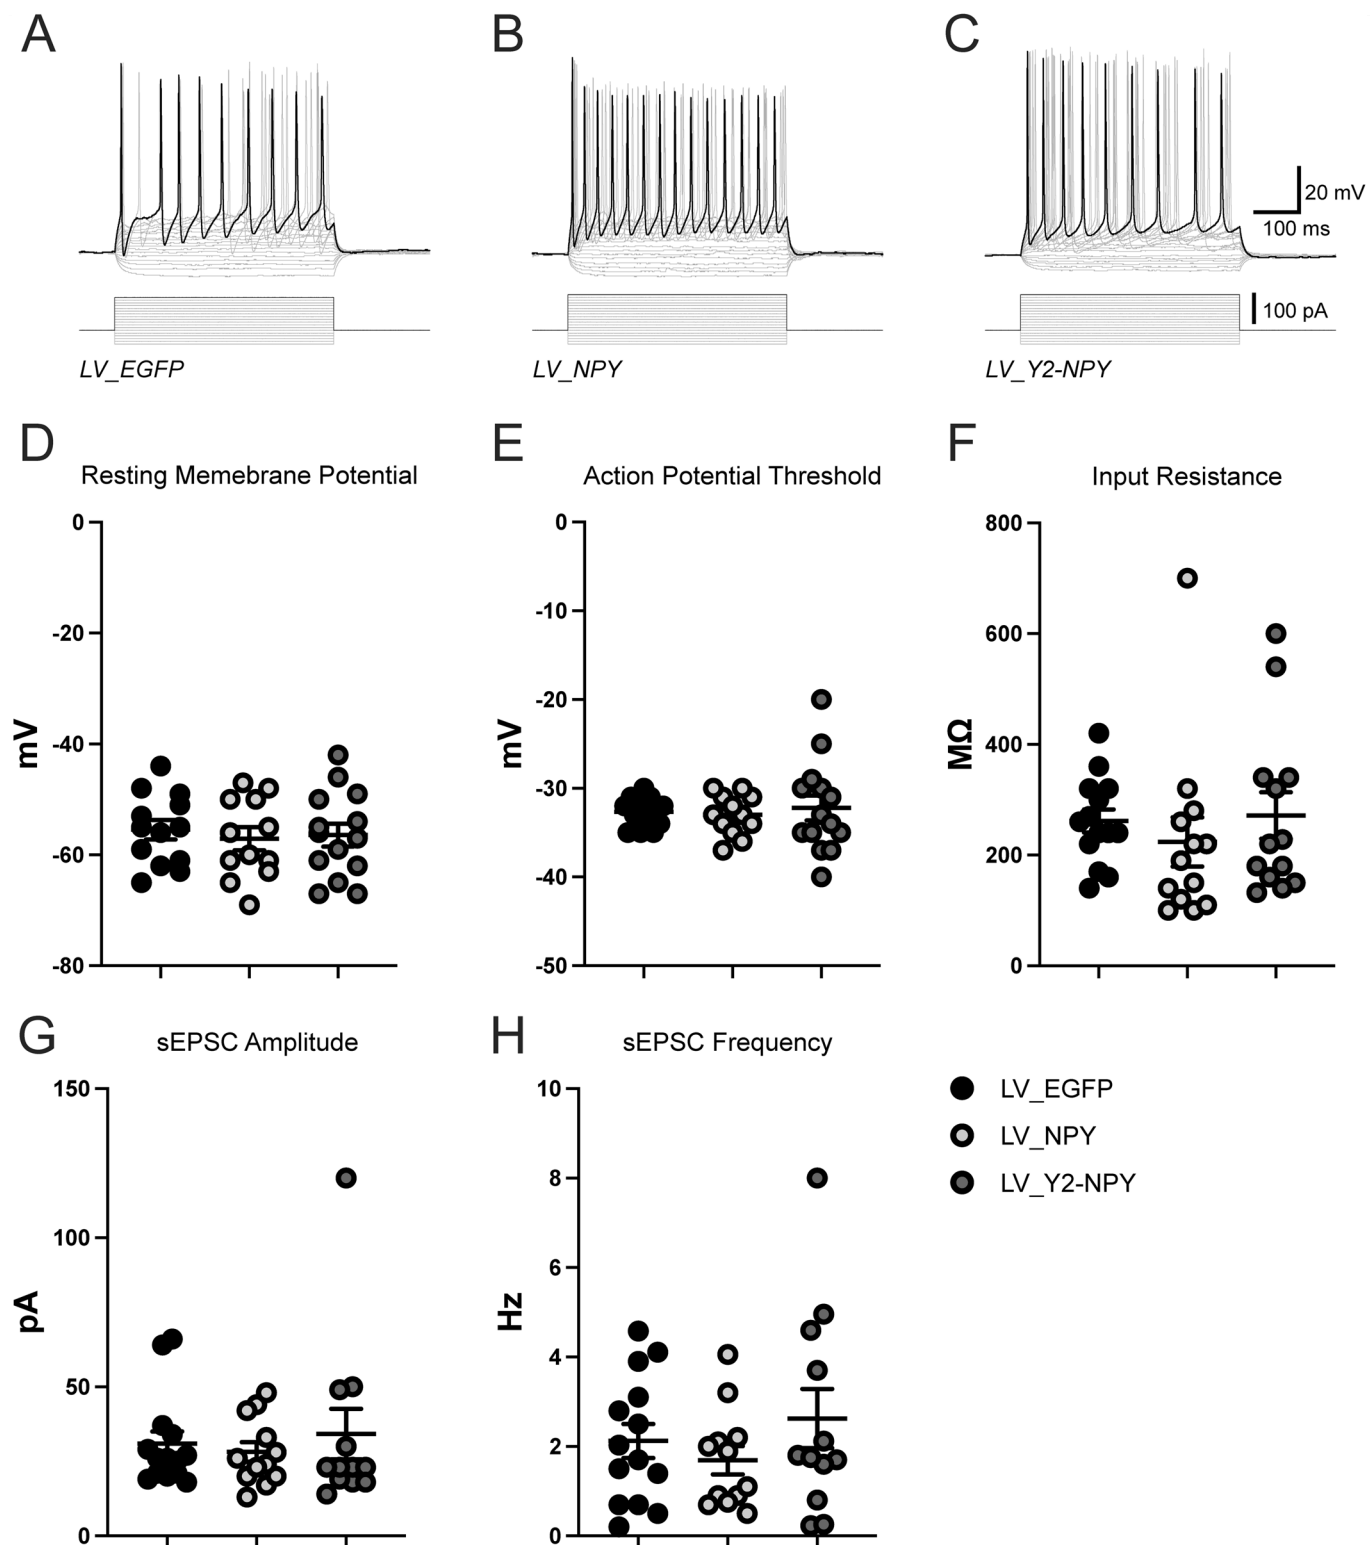

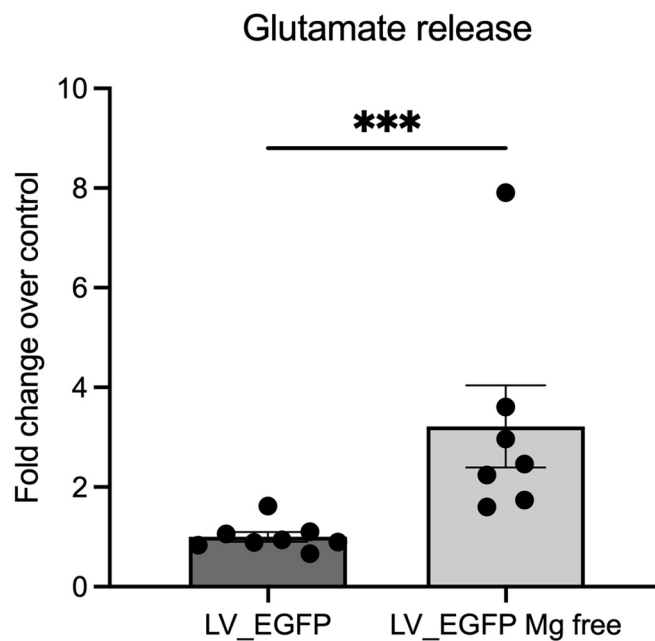

**Figure EV2. Effect of  $Mg^{2+}$  removal on glutamate release.**

Measurement of extracellular glutamate in transduced primary hippocampal neurons incubated for 20 min in Kreb's Ringer Hepes in the presence (LV\_EGFP) or absence of  $Mg^{2+}$  (LV\_EGFP Mg free). Values were normalized for total protein content and are presented as means  $\pm$  SEM of at least three independent experiments (biological replicates), with glutamate levels shown as fold change over control (LV\_EGFP =  $1.00 \pm 0.10$ ; LV\_EGFP Mg free =  $3.22 \pm 0.82$ ;  $p = 0.0006$ ). Statistical significance was calculated using the Mann-Whitney test. \*\*\* $p < 0.0001$ . Source data are available online for this figure.
